# Supplementary material
Source: PubMed Central journal article supplement (PMC8620659)
Supplement: 12889_2021_12220_MOESM1_ESM.pdf [file 12889_2021_12220_MOESM1_ESM.pdf]

# What do you know about ageing and dementia?

---

Are you between 18 to 44 years of age?

- Yes
- No

Do you currently reside in Australia?

Yes

No

Have you completed this survey before?

- Yes
- No

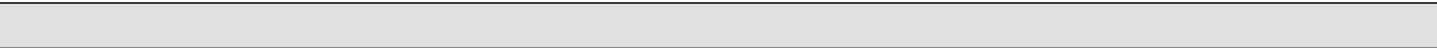

How old are you?

- 18
- 19
- 20
- 21
- 22
- 23
- 24
- 25
- 26
- 27
- 28
- 29
- 30
- 31
- 32
- 33
- 34
- 35
- 36
- 37
- 38
- 39
- 40
- 41
- 42
- 43
- 44

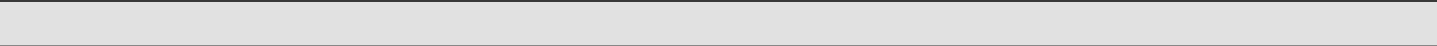

What is your gender?

- Male
- Female
- Other

---

What is your first language?

- English
- Mandarin
- Arabic
- Cantonese
- Vietnamese
- Italian
- Other

---

Please specify.

---



What state or territory do you reside in?

- SA
- NT
- WA
- QLD
- NSW
- VIC
- ACT
- TAS
- Other

---

Please specify.

---



What postcode do you reside in?

---



Are you currently undertaking any formal education?

- Yes
- No

---

What formal education are you currently undertaking?

- Less than Year 12 or equivalent
- Year 12 or equivalent
- Vocational qualification
- Associate diploma
- Undergraduate diploma
- Bachelor degree (including honours)
- Postgraduate diploma (including graduates)
- Master's degree
- Doctorate

---

What is the highest level of education you have completed?

- Less than Year 12 or equivalent
- Year 12 or equivalent
- Vocational qualification
- Associate diploma
- Undergraduate diploma
- Bachelor degree (including honours)
- Postgraduate diploma (including graduates)
- Master's degree
- Doctorate

Do you know what dementia is?

Yes

No

---

Please describe your understanding of dementia.

---

**Dementia describes a collection of symptoms that are caused by disorders affecting the brain (Dementia Australia, 2020). Dementia affects thinking, behaviour and the ability to perform everyday tasks. The most common type of dementia is Alzheimer's disease, but there are many others such as Vascular dementia and Frontotemporal dementia. Dementia is most common in late-life, that is, after 65 years of age.**

Do you know anyone, or have you known anyone with dementia?

- Yes  
 No

---

Please indicate their relationship to you.

- Partner/spouse
- Sibling
- Parent/parent in law
- Grandparent
- Aunty or uncle
- Cousin
- Friend
- Neighbour
- Client
- Other

---

Please specify.

---

---

How concerned are you about developing dementia?

- Not at all concerned
- Slightly concerned     Somewhat concerned
- Moderately concerned
- Extremely concerned



**Indicate the extent to which you agree or disagree with the following statements:**

|                                                          | 1. Strongly disagree  | 2. Disagree           | 3. Somewhat disagree  | 4. Somewhat agree     | 5. Agree              | 6. Strongly agree     |
|----------------------------------------------------------|-----------------------|-----------------------|-----------------------|-----------------------|-----------------------|-----------------------|
| Dementia is a normal part of ageing                      | <input type="radio"/> | <input type="radio"/> | <input type="radio"/> | <input type="radio"/> | <input type="radio"/> | <input type="radio"/> |
| Dementia is curable                                      | <input type="radio"/> | <input type="radio"/> | <input type="radio"/> | <input type="radio"/> | <input type="radio"/> | <input type="radio"/> |
| Dementia is preventable (able to be avoided)             | <input type="radio"/> | <input type="radio"/> | <input type="radio"/> | <input type="radio"/> | <input type="radio"/> | <input type="radio"/> |
| It is possible to reduce the risk of developing dementia | <input type="radio"/> | <input type="radio"/> | <input type="radio"/> | <input type="radio"/> | <input type="radio"/> | <input type="radio"/> |
| It is possible to delay the onset of dementia            | <input type="radio"/> | <input type="radio"/> | <input type="radio"/> | <input type="radio"/> | <input type="radio"/> | <input type="radio"/> |
| People my age have a good understanding of dementia      | <input type="radio"/> | <input type="radio"/> | <input type="radio"/> | <input type="radio"/> | <input type="radio"/> | <input type="radio"/> |

---

What sources have influenced your knowledge of dementia?

- Primary School
- Secondary School
- Tertiary Education
- Public health campaigns
- Friends or family members
- Online
- TV and radio
- Social media
- Books/magazines
- Health professionals
- Other

---

Please specify.

---

**A risk factor is something that increases a person's chance of developing a disease or condition. There are two types of risk factors: non-modifiable and modifiable. People have no control over non-modifiable risk factors, and they generally relate to genetics and age. People have control over modifiable risk factors. For example, sun exposure is a modifiable risk factor for developing skin cancer and smoking is a modifiable risk factor for developing lung cancer.**

Do you think there are any modifiable risk factors for dementia?

- Yes  
 No

---

Please list what you think are modifiable risk factors for dementia.

---

**There are non-modifiable risk factors for dementia including age that cannot be controlled. There are also modifiable risk factors that can reduce the chance of developing dementia in late-life.**

**Do you think the following factors are risk factors for developing dementia?**

|                                                | 1. Strongly disagree  | 2. Disagree           | 3. Somewhat disagree  | 4. Somewhat agree     | 5. Agree              | 6. Strongly agree     |
|------------------------------------------------|-----------------------|-----------------------|-----------------------|-----------------------|-----------------------|-----------------------|
| Hypertension (high blood pressure) in mid-life | <input type="radio"/> | <input type="radio"/> | <input type="radio"/> | <input type="radio"/> | <input type="radio"/> | <input type="radio"/> |
| Hearing loss in mid-life                       | <input type="radio"/> | <input type="radio"/> | <input type="radio"/> | <input type="radio"/> | <input type="radio"/> | <input type="radio"/> |
| Depression in late-life                        | <input type="radio"/> | <input type="radio"/> | <input type="radio"/> | <input type="radio"/> | <input type="radio"/> | <input type="radio"/> |
| Social isolation in late-life                  | <input type="radio"/> | <input type="radio"/> | <input type="radio"/> | <input type="radio"/> | <input type="radio"/> | <input type="radio"/> |
| Less education in early-life                   | <input type="radio"/> | <input type="radio"/> | <input type="radio"/> | <input type="radio"/> | <input type="radio"/> | <input type="radio"/> |
| Obesity in mid-life                            | <input type="radio"/> | <input type="radio"/> | <input type="radio"/> | <input type="radio"/> | <input type="radio"/> | <input type="radio"/> |
| Smoking in late-life                           | <input type="radio"/> | <input type="radio"/> | <input type="radio"/> | <input type="radio"/> | <input type="radio"/> | <input type="radio"/> |
| Physical inactivity in late-life               | <input type="radio"/> | <input type="radio"/> | <input type="radio"/> | <input type="radio"/> | <input type="radio"/> | <input type="radio"/> |
| Diabetes in late-life                          | <input type="radio"/> | <input type="radio"/> | <input type="radio"/> | <input type="radio"/> | <input type="radio"/> | <input type="radio"/> |

---

Hypertension in mid-life is a risk factor for developing dementia.



Estimate the percentage reduction in new cases of dementia if hypertension in mid-life is eliminated.

0% eliminated 100% eliminated

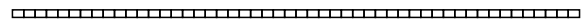

*(Place a mark on the scale above)*

---

Hearing loss in mid-life is a risk factor for developing dementia.



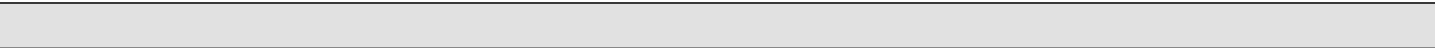

Estimate the percentage reduction in new cases of dementia if hearing loss in mid-life is eliminated.

0% eliminated

100% eliminated

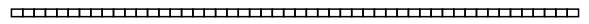

(Place a mark on the scale above)

---

Depression in late-life is a risk factor for developing dementia.

Estimate the percentage reduction in new cases of dementia if depression in late-life is eliminated.

0% eliminated

100% eliminated

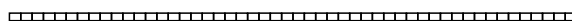

(Place a mark on the scale above)

---

Social isolation in late-life is a risk factor for developing dementia.

Estimate the percentage reduction in new cases of dementia if social isolation in late-life is eliminated.

0% eliminated 100% eliminated

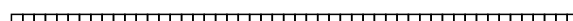

*(Place a mark on the scale above)*

---

Less education in early-life is a risk factor for developing dementia.



Estimate the percentage reduction in new cases of dementia if less education in early-life is eliminated.

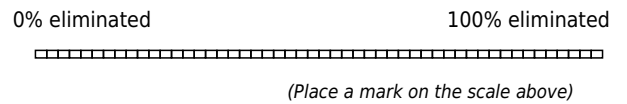

---

Obesity in mid-life is a risk factor for developing dementia.



Estimate the percentage reduction in new cases of dementia if obesity in mid-life is eliminated.

0% eliminated 100% eliminated

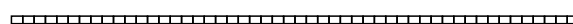

*(Place a mark on the scale above)*

---

Smoking in late-life is a risk factor for developing dementia.



Estimate the percentage reduction in new cases of dementia if smoking in late-life is eliminated.

0% eliminated

100% eliminated

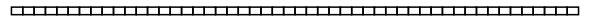

(Place a mark on the scale above)

---

Physical inactivity in late-life is a risk factor for developing dementia.



Estimate the percentage reduction in new cases of dementia if physical inactivity in late-life is eliminated.

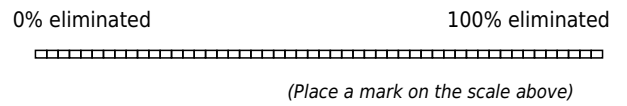

---

Diabetes in late-life is a risk factor for developing dementia.



Estimate the percentage reduction in new cases of dementia if diabetes in late-life is eliminated.

0% eliminated

100% eliminated



(Place a mark on the scale above)

---

Do you have hypertension?

- No  Yes (treated)  
 Yes (untreated)  Unsure

---

Do you have hearing loss?

- No  Yes (treated)  
 Yes (untreated)  Unsure

---

Have you been diagnosed with depression?

- No  Yes (treated)  
 Yes (untreated)  Unsure

---

Do you have diabetes?

- No  Yes (treated)  
 Yes (untreated)  Unsure

---

Are you obese?

- No  Yes (treated)  
 Yes (untreated)  Unsure

---

Do you smoke?

- Never  Previously  
 Sometimes  Always

---

Besides any isolation in relation to COVID-19, do you ever experience feelings of loneliness?

- Never  Sometimes  
 Always

---

Are you physically active?

- Never  Sometimes  
 Always



---

Now that you are aware of the risk factors for developing dementia, will you act on reducing your risk?

Yes  No

---

What steps will you take to reduce your risk of developing dementia?

---

At what age do you think people should start to take  
action to reduce their risk of dementia? (in years)

\_\_\_\_\_

---

What sources do you think would be the most effective in helping people to understand more about dementia? (e.g. social media)

---
